# Supplementary material for: Novel Iso-Reticular Zn(ii) Metal–Organic Frameworks constructed by Trinuclear-Triangular and Paddle-Wheel Units: Synthesis, Structure and Gas Adsorption
Source: Royal Society of Chemistry journal article supplement (doi:10.1039/c2dt12059c), 2012-01-01

Electronic Supplementary Information (ESI) for:

Novel Iso-Reticular Zn(II) Metal-Organic Frameworks  
constructed by Trinuclear-Triangular and Paddle-Wheel Units:  
Synthesis, Structure and Gas Adsorption

Yun Ling, Feilong Yang, Mingli Deng, Zhenxia Chen, Xiaofeng Liu, Linhong Weng, Yaming  
Zhou \*

Shanghai Key Laboratory of Molecular Catalysis and Innovative Materials,  
Department of Chemistry, Fudan University, Shanghai (200433), China

\*Corresponding Author: Dr. Y.M. Zhou, E-mail: [ymzhou@fudan.edu.cn](mailto:ymzhou@fudan.edu.cn)

Tel.: +86 21 65642261; Fax: +86 21 65643925;

**Table S1.** Crystal and Structure Refinement Data for **MAC-4** and **MAC-4-OH**

|                                                                          | <b>MAC-4</b>                                                                    | <b>MAC-4-OH</b>                                                                 |
|--------------------------------------------------------------------------|---------------------------------------------------------------------------------|---------------------------------------------------------------------------------|
| Formula                                                                  | C <sub>39</sub> H <sub>40</sub> N <sub>10</sub> O <sub>15</sub> Zn <sub>5</sub> | C <sub>39</sub> H <sub>48</sub> N <sub>10</sub> O <sub>22</sub> Zn <sub>5</sub> |
| F.W.                                                                     | 1215.66                                                                         | 1335.72                                                                         |
| Space group                                                              | Pnma                                                                            | Pnma                                                                            |
| <i>a</i> (Å)                                                             | 15.508(11)                                                                      | 15.585(4)                                                                       |
| <i>b</i> (Å)                                                             | 19.220(13)                                                                      | 19.237(5)                                                                       |
| <i>c</i> (Å)                                                             | 25.211(17)                                                                      | 25.305(7)                                                                       |
| <i>V</i> (Å <sup>3</sup> )                                               | 7515(9)                                                                         | 7587(3)                                                                         |
| <i>Z</i>                                                                 | 4                                                                               | 4                                                                               |
| <i>D<sub>c</sub></i> (g cm <sup>-3</sup> )                               | 1.075                                                                           | 1.169                                                                           |
| <i>μ</i> (mm <sup>-1</sup> )                                             | 1.621                                                                           | 1.618                                                                           |
| <i>F</i> (000)                                                           | 2456                                                                            | 2712                                                                            |
| <i>T</i> (K)                                                             | 293(2)                                                                          | 293(2)                                                                          |
| Total collected                                                          | 36894                                                                           | 34119,                                                                          |
| Unique data, R(int)                                                      | 6992, 0.138                                                                     | 7018, 0.202                                                                     |
| Observed [ <i>I</i> > 2σ( <i>I</i> )]                                    | 3438                                                                            | 3487                                                                            |
| GOF on <i>F</i> <sup>2</sup>                                             | 0.89                                                                            | 1.04                                                                            |
| <i>R</i> <sub>1</sub> , <sup>a</sup> <i>wR</i> <sub>2</sub> <sup>b</sup> | 0.0551, 0.1700                                                                  | 0.1067, 0.3441                                                                  |
| Δρ <sub>max</sub> /Δρ <sub>min</sub> (e Å <sup>-3</sup> )                | -0.55, 0.84                                                                     | -1.04, 1.49                                                                     |

$$^a R_1 = \frac{\sum ||F_o| - |F_c||}{\sum |F_o|}, \quad ^b wR_2 = \left[ \frac{\sum w(F_o^2 - F_c^2)^2}{\sum w(F_o^2)^2} \right]^{1/2}$$

**Table S2.** Selected bond lengths [Å] and angles [°] for **MAC-4** and **MAC-4-OH**

| <b>MAC-4</b>                             |           |                                      |            |
|------------------------------------------|-----------|--------------------------------------|------------|
| Zn1–O7                                   | 2.024(3)  | Zn1–N1                               | 2.013(5)   |
| Zn1–N4                                   | 2.037(5)  | Zn1–O5 <sup>i</sup>                  | 2.263(9)   |
| Zn1–O6 <sup>i</sup>                      | 2.034(9)  | Zn2–O1                               | 2.063(5)   |
| Zn2–O3                                   | 2.046(5)  | Zn2–N3                               | 2.028(6)   |
| Zn2–O2 <sup>ii</sup>                     | 2.055(6)  | Zn2–O4 <sup>ii</sup>                 | 2.047(5)   |
| Zn3–O7                                   | 1.990(5)  | Zn3–N2                               | 1.989(6)   |
| Zn3–N5 <sup>iii</sup>                    | 1.949(6)  |                                      |            |
| O7–Zn1–N1                                | 97.0(2)   | O7–Zn1–N4                            | 93.80(19)  |
| O5 <sup>i</sup> –Zn1–O7                  | 88.4(2)   | O6 <sup>i</sup> –Zn1–O7              | 135.0(3)   |
| N1–Zn1–N4                                | 110.1(2)  | O5 <sup>i</sup> –Zn1–N1              | 102.6(2)   |
| O6 <sup>i</sup> –Zn1–N1                  | 117.0(3)  | O5 <sup>i</sup> –Zn1–N4              | 146.7(2)   |
| O6 <sup>i</sup> –Zn1–N4                  | 100.5(3)  | O1–Zn2–O3                            | 87.4(2)    |
| O1–Zn2–N3                                | 99.4(2)   | O1–Zn2–O2 <sup>ii</sup>              | 158.4(2)   |
| O1–Zn2–O4 <sup>ii</sup>                  | 87.6(2)   | O3–Zn2–N3                            | 99.9(2)    |
| O2 <sup>ii</sup> –Zn2–O3                 | 87.5(2)   | O3–Zn2–O4 <sup>ii</sup>              | 159.1(2)   |
| O2 <sup>ii</sup> –Zn2–N3                 | 102.2(2)  | O4 <sup>ii</sup> –Zn2–N3             | 101.0(2)   |
| O2 <sup>ii</sup> –Zn2–O4 <sup>ii</sup>   | 89.7(2)   | O7–Zn3–N2                            | 98.10(16)  |
| O7–Zn3–N5 <sup>iii</sup>                 | 112.2(3)  | N2–Zn3–N5 <sup>iii</sup>             | 117.80(17) |
| N2–Zn3–N2 <sup>iv</sup>                  | 109.3(2)  |                                      |            |
| <b>2</b>                                 |           |                                      |            |
| Zn1–O7                                   | 2.021(6)  | Zn1–N2                               | 2.021(8)   |
| Zn1–O5 <sup>i</sup>                      | 2.367(14) | Zn1–O6 <sup>i</sup>                  | 2.002(13)  |
| Zn1–N5 <sup>v</sup>                      | 2.036(10) | Zn2–O1                               | 2.051(10)  |
| Zn2–O3                                   | 2.036(9)  | Zn2–N3                               | 2.032(10)  |
| Zn2–O2 <sup>vi</sup>                     | 2.036(10) | Zn2–O4 <sup>vi</sup>                 | 2.038(10)  |
| Zn3–O7                                   | 1.978(10) | Zn3–N1                               | 1.998(9)   |
| Zn3–N4                                   | 1.955(14) |                                      |            |
| O7–Zn1–N2                                | 96.6(4)   | O5 <sup>i</sup> –Zn1–O7              | 88.8(5)    |
| O6 <sup>i</sup> –Zn1–O7                  | 133.0(4)  | O7–Zn1–N5 <sup>v</sup>               | 93.9(4)    |
| O5 <sup>i</sup> –Zn1–N2                  | 97.0(4)   | O6 <sup>i</sup> –Zn1–N2              | 117.7(5)   |
| N2–Zn1–N5 <sup>v</sup>                   | 110.4(4)  | O5 <sup>i</sup> –Zn1–N5 <sup>v</sup> | 151.9(4)   |
| O6 <sup>i</sup> –Zn1–N5 <sup>v</sup>     | 102.2(4)  | O1–Zn2–O3                            | 88.6(4)    |
| O1–Zn2–N3                                | 98.5(4)   | O1–Zn2–O2 <sup>vii</sup>             | 158.5(4)   |
| O1–Zn2–O4 <sup>vii</sup>                 | 86.3(4)   | O3–Zn2–N3                            | 99.6(4)    |
| O2 <sup>vii</sup> –Zn2–O3                | 87.1(4)   | O3–Zn2–O4 <sup>vii</sup>             | 157.9(4)   |
| O2 <sup>vii</sup> –Zn2–N3                | 103.0(4)  | O4 <sup>vii</sup> –Zn2–N3            | 102.4(4)   |
| O2 <sup>vii</sup> –Zn2–O4 <sup>vii</sup> | 89.9(4)   | O7–Zn3–N1                            | 97.9(3)    |
| O7–Zn3–N4                                | 112.2(5)  | N1–Zn3–N4                            | 118.0(3)   |
| N1–Zn3–N1 <sup>viii</sup>                | 109.1(4)  |                                      |            |

Symmetry codes used: i: -1/2+x, y, 3/2-z; ii: 1-x, 1-y, 2-z; iii: -1/2+x, 1/2-y, 3/2-z; iv: x, 1/2-y, z; v: 1/2+x, y, 3/2-z; vi: -x, 2-y, 2-z; viii: x, 3/2-y, z.

**Figure S1.** the structure motif of MAC-4-OH showing as 30% ellipsoid probability  
(A:  $x, 1.5-y, z$ ; B:  $-x, 2-y, 2-z$ ; C:  $-0.5+x, y, 1.5-z$ ; D:  $0.5+x, 1.5-y, 1.5-z$ ; E:  $0.5+x, y, 1.5-z$ . Hydrogen atoms and guest molecules are omitted for clarity)

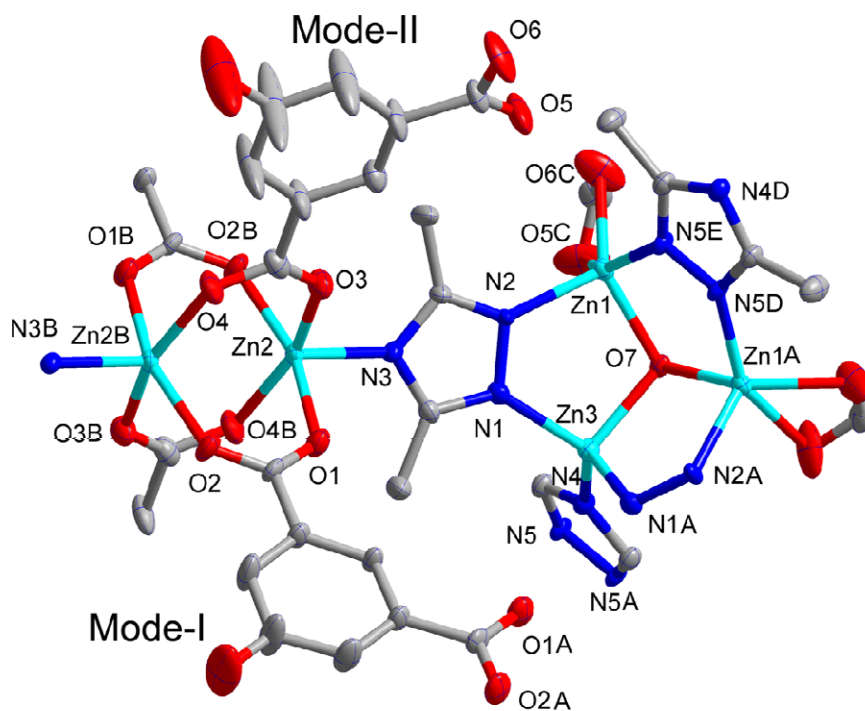

**Figure S2.** The PXRD patterns of as-make crystals of MAC-4 and MAC-4-OH compared with simulated one obtained from CIF data.

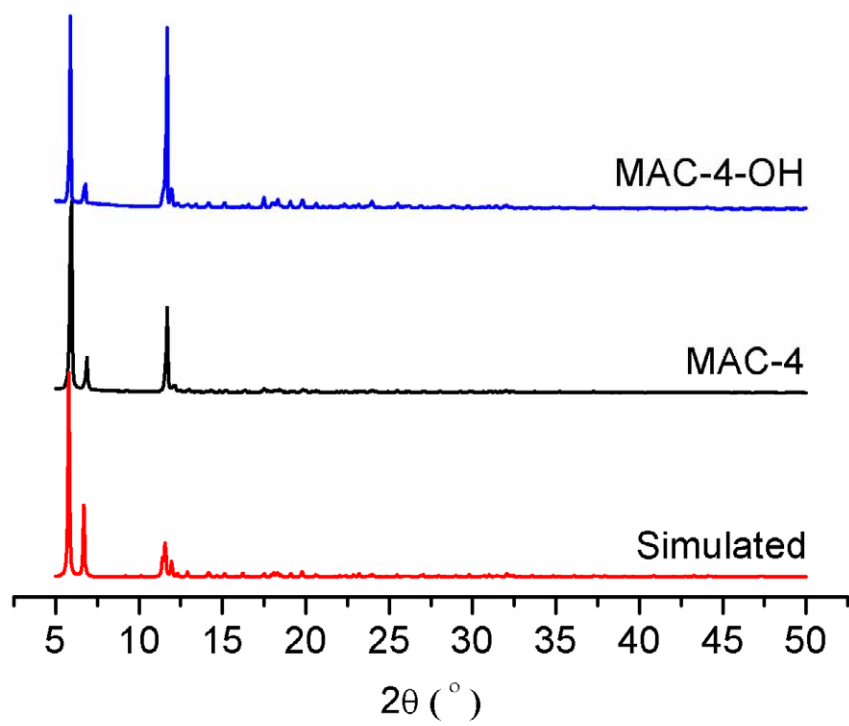

**Figure S3** the TGA data of as-made MAC-4 and MAC-4-OH (a) and the variable temperature PXRD data of as-made sample of MAC-4 (b)

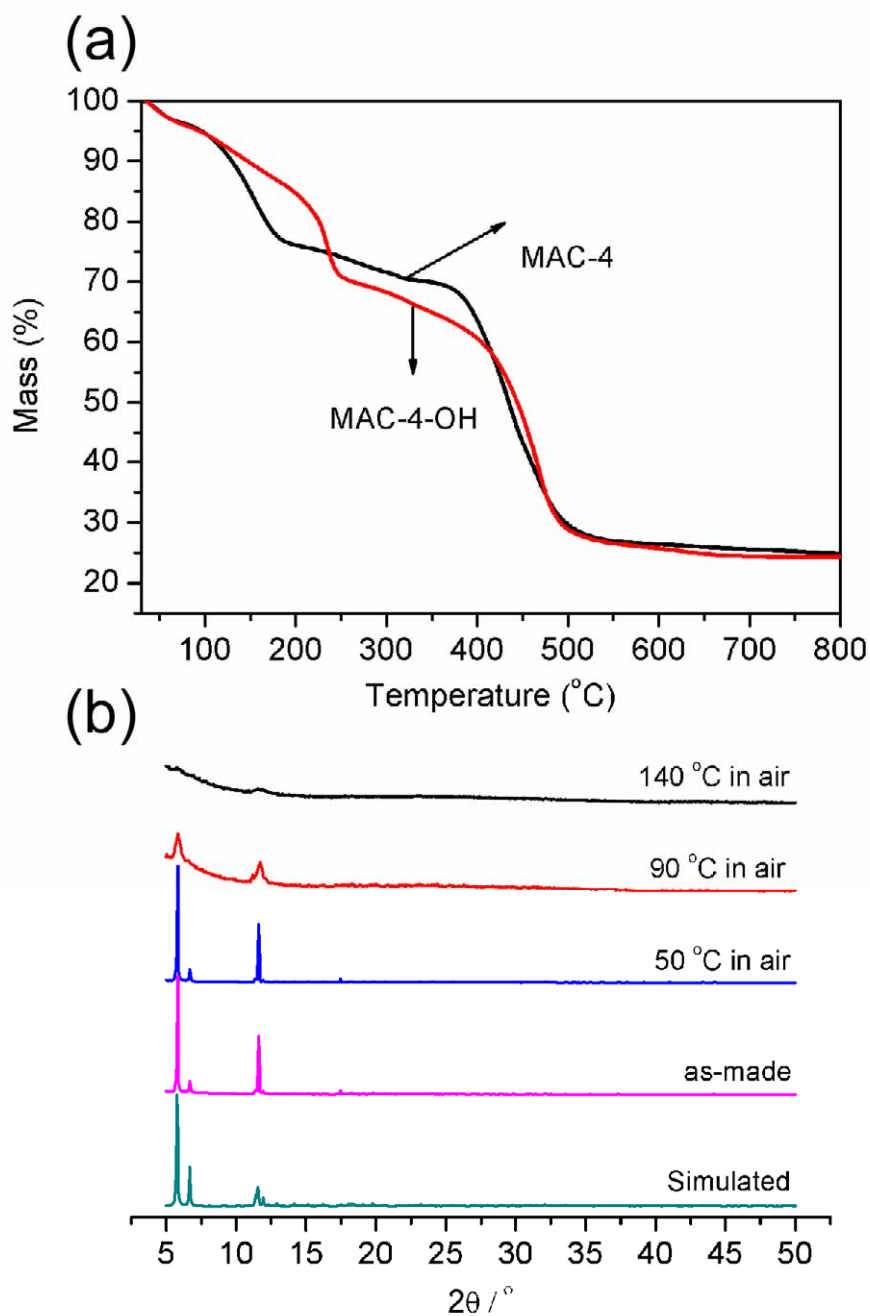

**Figure S4** The high pressure CO<sub>2</sub> uptake on activated MAC-4-OH at 298 K.

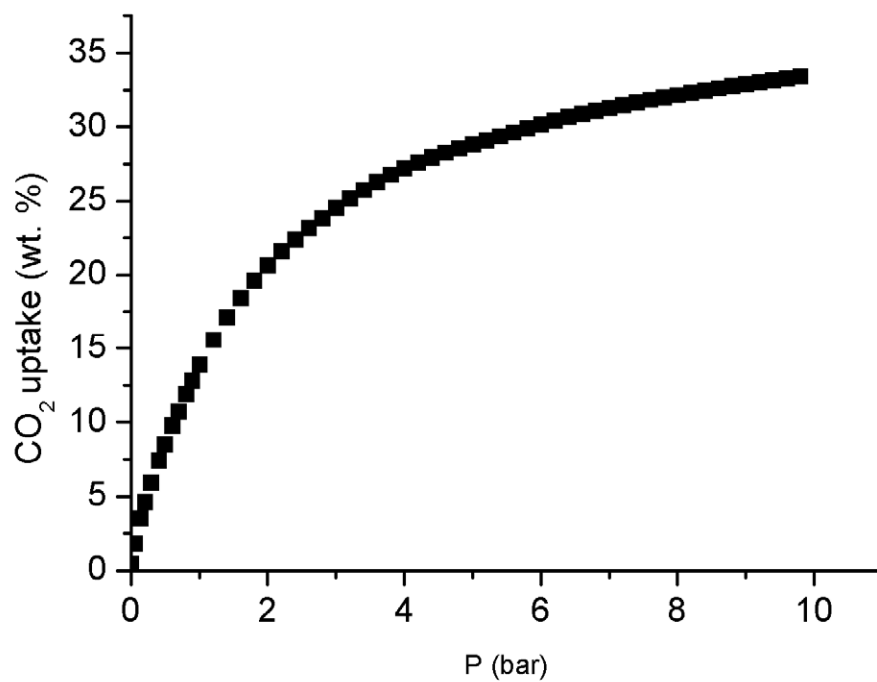

**Figure S5** The CO<sub>2</sub> isotherms of MAC-4 (a, left) and MAC-4-OH (b, left) at 288 and 298 K fitted by Virial analyses and the isosteric heat.

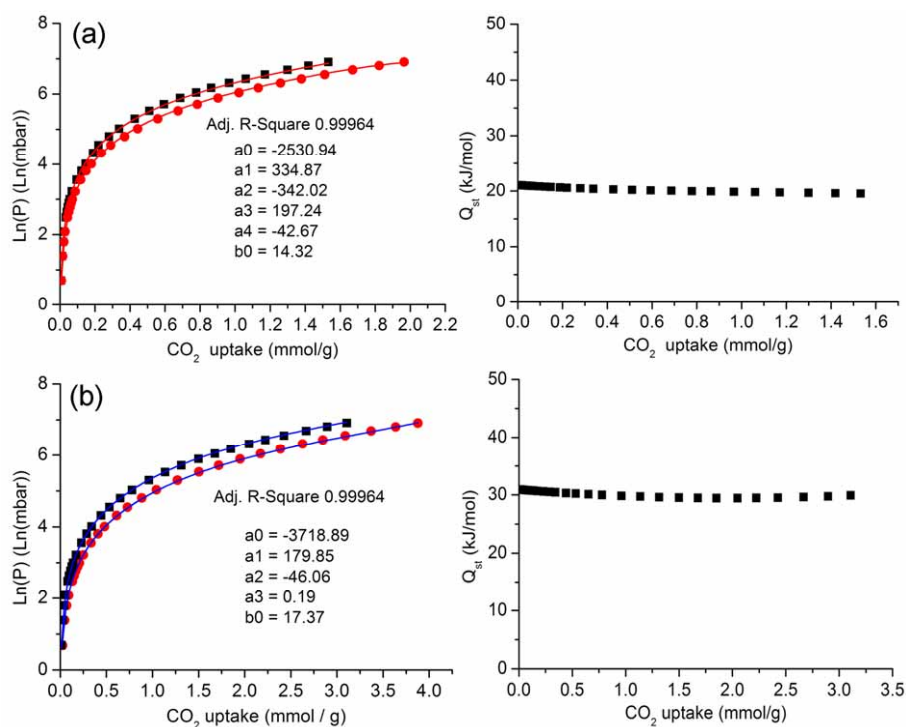

### Virial analyses

$$\ln(P) = \ln(x) + \frac{1}{T} \sum_{i=0}^m a_i x^i + \sum_{i=0}^n b_i x^i \quad (1)$$

where:  $P$  is pressure,  $x$  means sorption amounts in mmol/g,  $T$  means the temperature,  $a$  and  $b$  代

### Isosteric heat:

$$Q_{st} = -R \sum_{i=0}^m a_i x^i \quad (2)$$

where:  $R = 8.314 \text{ J/K}\cdot\text{mol}$ ,  $a$  the parameter obtained by the fitting Equ. 1.



**Figure S6** The QEq method calculated charges (e) on atoms of MAC-4 (left) and MAC-4-OH (right).

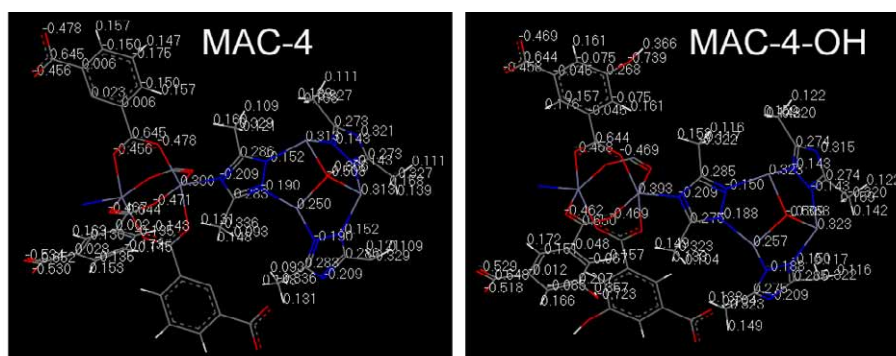

The GCMC simulations were performed by the Sorption program, Locate task and Metropolis method in the MS modeling 5.0 package.<sup>1</sup> The CO<sub>2</sub> was optimized by Dmol3 program. The charges for atoms of MAC-4 and MAC-4-OH and CO<sub>2</sub> were calculated by QEq method and QEq\_neutral1.0 parameter as shown in Figure S7. The frameworks of ideally desolvated MAC-4 and MAC-4-OH and CO<sub>2</sub> were considered to be rigid during the simulation process. All parameters for CO<sub>2</sub> molecule and atoms of ideally desolvated MAC-4 and MAC-4-OH were modeled with the universal forcefield (UFF) embedded in the MS modeling 5.0 package. The cutoff radius was chosen as 12.5 Å for the L-J potential, and the cubic spline method was applied to make the potential function smoothly converge to zero at the cutoff radius. The  $5 \times 10^6$  maximum loading steps,  $5 \times 10^7$  production steps, automated temperature control in the annealing cycles and 40 temperature cycles were employed.

**S1.** Accelrys, Materials Studio Getting Started, release 5.0; Accelrys Software, Inc.: San Diego, CA, 2009.

**Figure S7** Preferential CO<sub>2</sub> location in MAC-4-OH (a) and MAC-4 (b) obtained from GCMC calculations. (The framework shows as space filling mode, while CO<sub>2</sub> shows as ball-stick mode. The green circle on picture *a* and *b* shows the existence of hydrogen bonding between  $\mu_3$ -OH and O atom of CO<sub>2</sub>. As showing in picture *a*, the distance of the C atom of CO<sub>2</sub> labeled as yellow to O atom of the hydroxyl group of OH-IPA ligand (C $\cdots$ O) is *ca.* 3.35 Å, slightly larger than the sum of van der Waals radii of carbon (1.70 Å) and oxygen (1.52 Å), suggesting electrostatic attractive interaction between them)

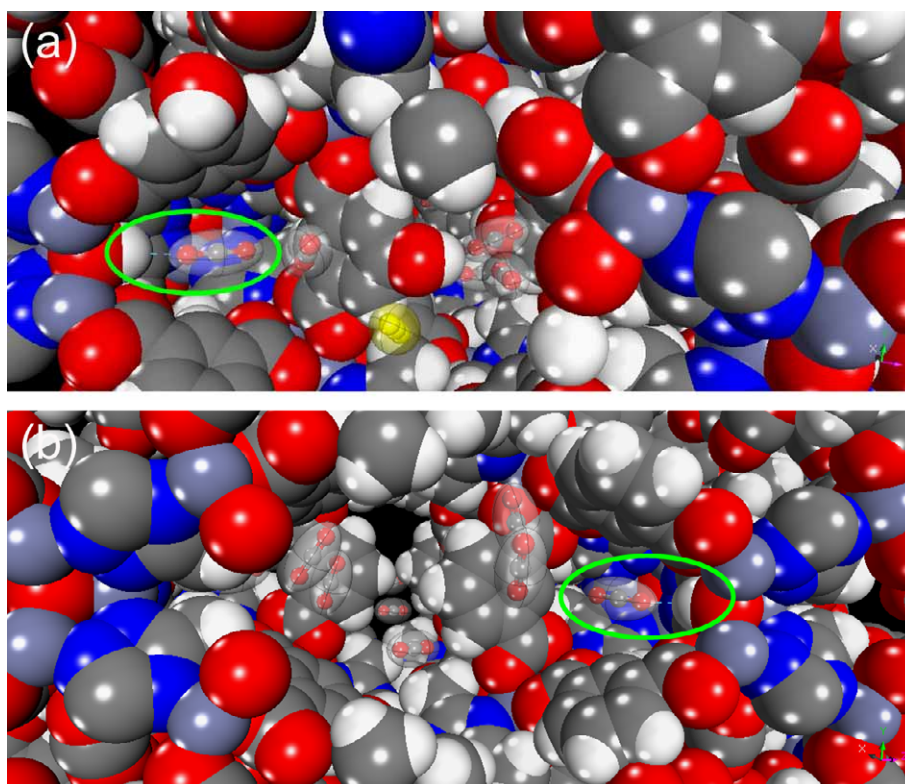

Supplement: c2dt12059c.pdf [file c2dt12059c.pdf]
